# Supplementary material
Source: PubMed Central journal article supplement (PMC1559763)

Number of maximal L-mers

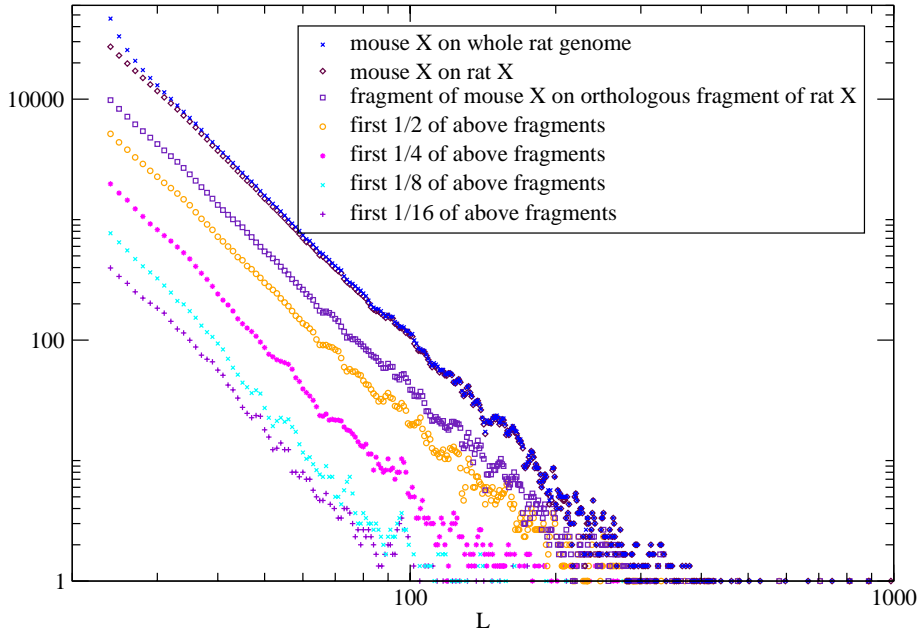

Supplement: pnas_0605735103_1.pdf [file pnas_0605735103_1.pdf]

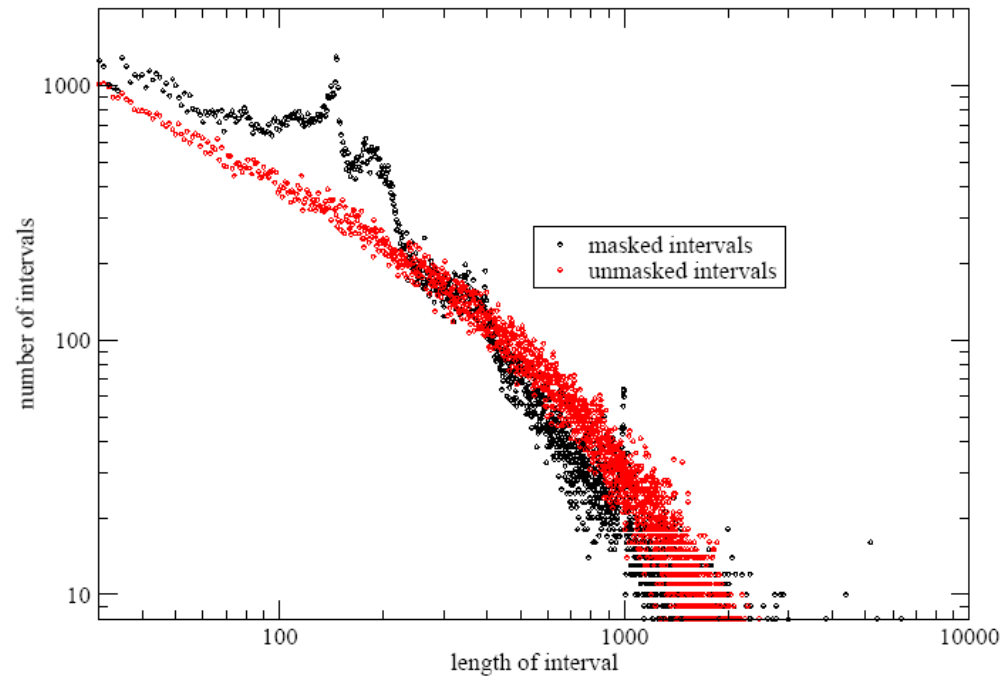

Supplement: pnas_0605735103_2.pdf [file pnas_0605735103_2.pdf]

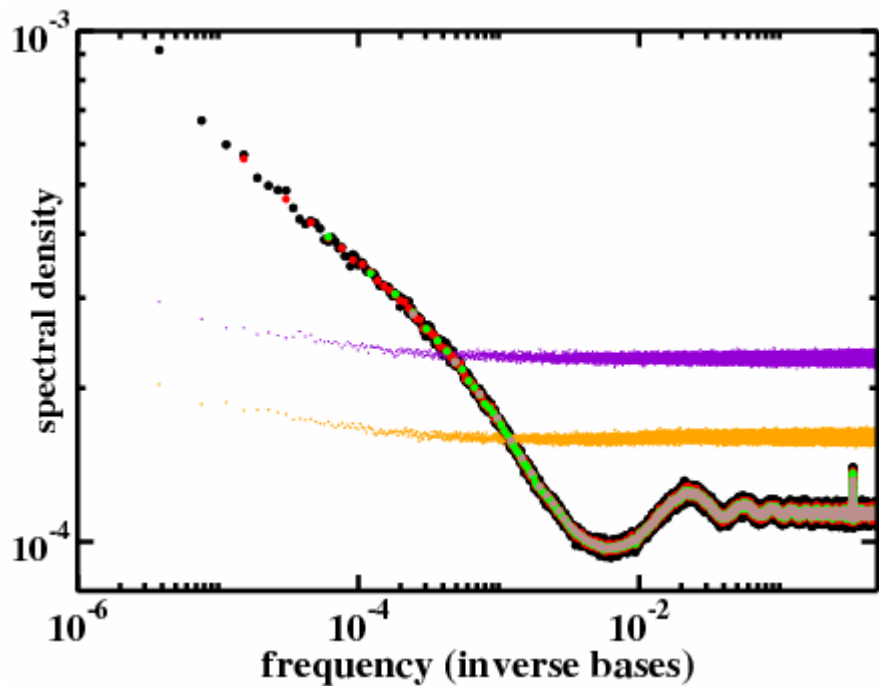

Supplement: pnas_0605735103_3.pdf [file pnas_0605735103_3.pdf]

# *Drosophila melanogaster*/*yakuba* maximal L-mer distribution

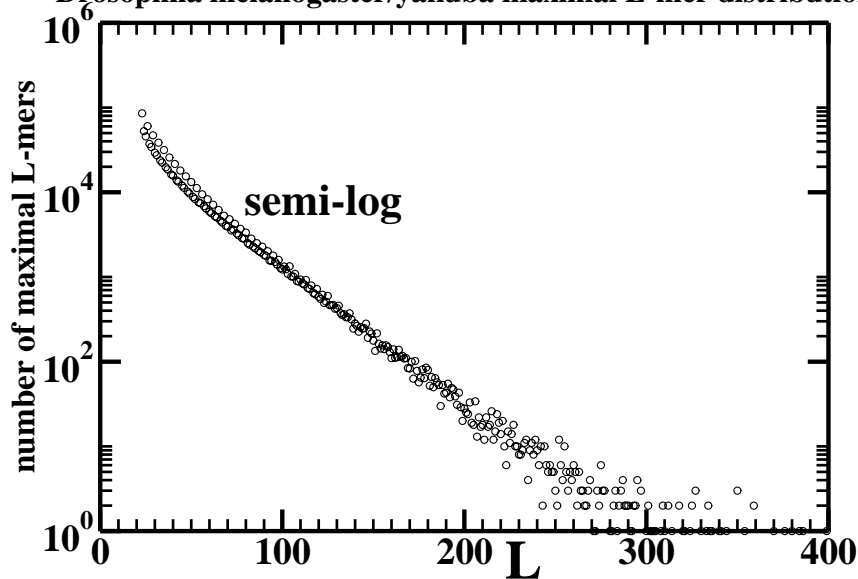

Supplement: pnas_0605735103_4.pdf [file pnas_0605735103_4.pdf]
